# Supplementary material for: Risk Factors and Genomic Characteristics of Recurrent Meningiomas Identified Through Routine Clinical Testing
Source: Research Square preprint supplement (doi:10.21203/rs.3.rs-7785145/v1), 2025-10-21
Supplement: Supplementary file 1 [file 458787e7d43d779280bdf807.docx]

| **Table1 Demographic baseline information of recurrent meningioma** | | |
| --- | --- | --- |
| Variables |  | Value |
| **Demographics** |  |  |
| No. of patients |  | 65 |
| Age |  | 53.6±13.6 |
| 20-39 |  | 12(18.5%) |
| 40-59 |  | 29(44.6%) |
| ≥60 |  | 24(36.9%) |
| Sex |  |  |
| Female |  | 40(61.5%) |
| Male |  | 25(38.5%) |
| Location |  |  |
| Parasgittal |  | 34(52.3%) |
| Others |  | 31(47.7%) |
| Peritumoral edema |  |  |
| Yes |  | 18(27.7%) |
| *No |  | 47(72.3%) |
| First extent of resection |  |  |
| GTR |  | 39(60%) |
| STR |  | 26(40%) |
| Max Diameter |  |  |
| ＜3 |  | 16(24.6%) |
| ≥3 |  | 49(75.4%) |
| PFS（m） |  | 73.3±57.5 |
|  |  |  |
| *Values are presented as the number of patients (%) or mean ± SD | | |
