# Supplementary material for: Risk Factors and Genomic Characteristics of Recurrent Meningiomas Identified Through Routine Clinical Testing
Source: Research Square preprint supplement (doi:10.21203/rs.3.rs-7785145/v1), 2025-10-21
Supplement: Supplementary file 2 [file d04482a51698dfb06feb9327.docx]

| **Table 2 Pathological information of recurrent meningioma** | | |
| --- | --- | --- |
| Variables | Recurrence Time（months） | Value |
| **Pathology** |  |  |
| Last WHO Grade |  |  |
| 1 | 86.54±60.01 | 46(70.8%) |
| 2 | 47.58±39.63 | 12(18.5%) |
| 3 | 30.71±24.79 | 7(10.7%) |
| After WHO Grade |  |  |
| 1 | 111.62±64.25 | 21(32.3%) |
| 2 | 61.67±49.85 | 33(50.8%) |
| 3 | 35.27±37.06 | 11(16.9%) |
| Last Ki67 |  |  |
| ＜10 | 87.23±58.83 | 48(73.8%) |
| ≥10 | 34.12±29.16 | 17(26.2%) |
| After Ki67 |  |  |
| ＜10 | 114.25±62.00 | 25(38.5%) |
| ≥10 | 55.16±45.30 | 45(61.5%) |
| **Pathology category** |  |  |
| Meningothelial meningioma | 74.78±59.23 | 9(13.8%) |
| Transitional meningioma | 100.38±64.05 | 24(36.9%) |
| Fibrous (fibroblastic) meningiom | 99.00±59.25 | 3(4.6%) |
| Angiomatous meningioma | / | 1(1.5%) |
| Metaplastic meningioma | / | 1(1.5%) |
| Atypical meningioma | 52.87±38.75 | 15(23.2%) |
| Clear cell meningioma | 49.00±62.23 | 2(3.1%) |
| Chordoid meningioma | 65.00±57.98 | 2(3.1%) |
| Papillary meningioma | / | 1(1.5%) |
| Anaplastic (malignant) meningioma | 13.57±10.11 | 7(10.8%) |
|  |  |  |
| Values are presented as the number of patients (%) or mean ± SD | |  |
